# Supplementary material for: Simultaneous control of spectroscopic and electrochemical properties in functionalised electrochemiluminescent tris(2,2′-bipyridine)ruthenium(ii) complexes
Source: Royal Society of Chemistry journal article supplement (doi:10.1039/c0an00952k), 2011-01-01
Supplement: c0an00952k.pdf [file c0an00952k.pdf]

Electronic Supplementary Information for:

**Simultaneous control of spectroscopic and electrochemical properties in ECL active tris(2,2'-bipyridine)ruthenium(II) derivatives containing chemical attachment functionality**

Gregory J. Barbante, Conor F. Hogan\*, David J. D. Wilson, Naomi A. Lewcenko,

Frederick M. Pfeffer, Neil W. Barnett and Paul S. Francis\*

**Table S1.** Comparison of HOMO - LUMO gap (H-L) calculated by DFT and time dependant (TD) DFT with experimental data for the  $[\text{Ru}(\text{bpy})_2(\text{L})]^{2+}$  complexes in acetonitrile.

| Complex number | TD-DFT<br>H-L / eV | DFT<br>H-L / eV | $\Delta E^o$ (II - I) <sup>a</sup><br>/ eV | Photoluminescence<br>$\lambda_{\text{max}}$ / eV | Absorbance<br>$\lambda_{\text{max}}$ / eV |
|----------------|--------------------|-----------------|--------------------------------------------|--------------------------------------------------|-------------------------------------------|
| 0              | 2.74               | 3.81            | 2.65                                       | 2.01                                             | 2.75                                      |
| 7              | 2.70               | 3.78            | 2.59                                       | 1.98                                             | 2.77                                      |
| 1              | 2.70               | 3.78            | 2.59                                       | 1.97                                             | 2.73                                      |
| 6              | 2.71               | 3.78            | 2.59                                       | 1.97                                             | 2.73                                      |
| 4              | 2.33               | 3.44            | 2.43                                       | 1.86                                             | 2.64                                      |
| 2              | 2.38               | 3.50            | 2.49                                       | 1.85                                             | 2.68                                      |
| 3              | 2.43               | 3.54            | 2.38                                       | 1.81                                             | 2.59                                      |
| 5              | 2.47               | 3.58            | 2.38                                       | 1.81                                             | 2.59                                      |

**Table S2. Compound 0.** Mulliken population analysis of frontier molecular orbitals.

| Orbital     | Energy (eV)  | % Ru      | % bpy     | % ligand |
|-------------|--------------|-----------|-----------|----------|
| LUMO+6      | -1.54        | 4         | 96        |          |
| LUMO+5      | -1.61        | 3         | 97        |          |
| LUMO+4      | -1.61        | 3         | 97        |          |
| LUMO+3      | -1.95        | 1         | 99        |          |
| LUMO+2      | -2.59        | 4         | 96        |          |
| LUMO+1      | -2.59        | 4         | 96        |          |
| <b>LUMO</b> | <b>-2.71</b> | <b>2</b>  | <b>98</b> |          |
| <b>HOMO</b> | <b>-6.50</b> | <b>80</b> | <b>20</b> |          |
| HOMO-1      | -6.67        | 76        | 24        |          |
| HOMO-2      | -6.67        | 76        | 24        |          |
| HOMO-3      | -7.80        | 0         | 100       |          |
| HOMO-4      | -7.80        | 0         | 100       |          |

**Table S3. Compound 1.** Mulliken population analysis of frontier molecular orbitals.

| Orbital | Energy (eV) | % Ru | % bpy | % ligand |
|---------|-------------|------|-------|----------|
| LUMO+6  | -1.50       | 4    | 91    | 5        |
| LUMO+5  | -1.52       | 2    | 52    | 46       |
| LUMO+4  | -1.59       | 3    | 96    | 1        |
| LUMO+3  | -1.90       | 1    | 79    | 20       |
| LUMO+2  | -2.52       | 3    | 15    | 81       |
| LUMO+1  | -2.57       | 4    | 95    | 1        |
| LUMO    | -2.68       | 2    | 83    | 15       |
| HOMO    | -6.43       | 79   | 13    | 8        |
| HOMO-1  | -6.58       | 75   | 12    | 13       |
| HOMO-2  | -6.61       | 75   | 20    | 4        |
| HOMO-3  | -7.73       | 1    | 8     | 91       |
| HOMO-4  | -7.78       | 0    | 99    | 0        |

**Table S4. Compound 2.** Mulliken population analysis of frontier molecular orbitals.

| Orbital | Energy (eV) | % Ru | % bpy | % ligand |
|---------|-------------|------|-------|----------|
| LUMO+6  | -1.66       | 3    | 97    | 0        |
| LUMO+5  | -1.83       | 2    | 87    | 12       |
| LUMO+4  | -2.29       | 0    | 13    | 87       |
| LUMO+3  | -2.52       | 2    | 0     | 98       |
| LUMO+2  | -2.66       | 4    | 95    | 1        |
| LUMO+1  | -2.72       | 3    | 96    | 1        |
| LUMO    | -3.20       | 5    | 2     | 92       |
| HOMO    | -6.68       | 79   | 14    | 7        |
| HOMO-1  | -6.85       | 76   | 20    | 4        |
| HOMO-2  | -6.86       | 74   | 12    | 13       |
| HOMO-3  | -7.85       | 0    | 99    | 0        |
| HOMO-4  | -7.88       | 1    | 97    | 2        |

**Table S5. Compound 3.** Mulliken population analysis of frontier molecular orbitals.

| Orbital | Energy (eV) | % Ru | % bpy | % ligand |
|---------|-------------|------|-------|----------|
| LUMO+6  | -1.65       | 3    | 97    | 0        |
| LUMO+5  | -1.82       | 2    | 84    | 14       |
| LUMO+4  | -2.24       | 0    | 15    | 84       |
| LUMO+3  | -2.43       | 2    | 0     | 98       |
| LUMO+2  | -2.65       | 4    | 95    | 1        |
| LUMO+1  | -2.71       | 3    | 95    | 2        |
| LUMO    | -3.13       | 5    | 3     | 92       |
| HOMO    | -6.65       | 79   | 14    | 7        |
| HOMO-1  | -6.82       | 76   | 20    | 4        |
| HOMO-2  | -6.83       | 75   | 12    | 13       |
| HOMO-3  | -7.84       | 0    | 99    | 0        |
| HOMO-4  | -7.87       | 1    | 96    | 3        |

**Table S6. Compound 4.** Mulliken population analysis of frontier molecular orbitals.

| Orbital | Energy (eV) | % Ru | % bpy | % ligand |
|---------|-------------|------|-------|----------|
| LUMO+6  | -1.78       | 3    | 97    | 0        |
| LUMO+5  | -1.90       | 2    | 77    | 21       |
| LUMO+4  | -2.24       | 1    | 25    | 74       |
| LUMO+3  | -2.50       | 2    | 2     | 97       |
| LUMO+2  | -2.80       | 5    | 93    | 1        |
| LUMO+1  | -2.85       | 4    | 93    | 3        |
| LUMO    | -3.23       | 5    | 4     | 90       |
| HOMO    | -6.65       | 73   | 18    | 9        |
| HOMO-1  | -6.86       | 70   | 25    | 5        |
| HOMO-2  | -6.86       | 69   | 15    | 16       |
| HOMO-3  | -7.58       | 0    | 0     | 99       |
| HOMO-4  | -7.69       | 0    | 0     | 100      |

**Table S7. Compound 5.** Mulliken population analysis of frontier molecular orbitals.

| Orbital | Energy (eV) | % Ru | % bpy | % ligand |
|---------|-------------|------|-------|----------|
| LUMO+6  | -1.64       | 3    | 97    | 0        |
| LUMO+5  | -1.80       | 2    | 81    | 17       |
| LUMO+4  | -2.19       | 0    | 19    | 81       |
| LUMO+3  | -2.35       | 2    | 0     | 98       |
| LUMO+2  | -2.64       | 4    | 95    | 1        |
| LUMO+1  | -2.71       | 3    | 95    | 2        |
| LUMO    | -3.07       | 5    | 3     | 92       |
| HOMO    | -6.63       | 79   | 14    | 7        |
| HOMO-1  | -6.80       | 76   | 20    | 4        |
| HOMO-2  | -6.81       | 75   | 12    | 13       |
| HOMO-3  | -7.84       | 0    | 99    | 0        |
| HOMO-4  | -7.87       | 1    | 95    | 4        |

**Table S8. Compound 6.** Mulliken population analysis of frontier molecular orbitals.

| Orbital | Energy (eV) | % Ru | % bpy | % ligand |
|---------|-------------|------|-------|----------|
| LUMO+6  | -1.50       | 4    | 89    | 8        |
| LUMO+5  | -1.56       | 3    | 43    | 55       |
| LUMO+4  | -1.59       | 3    | 94    | 3        |
| LUMO+3  | -1.91       | 1    | 75    | 24       |
| LUMO+2  | -2.54       | 4    | 19    | 77       |
| LUMO+1  | -2.58       | 4    | 95    | 1        |
| LUMO    | -2.68       | 2    | 80    | 19       |
| HOMO    | -6.45       | 79   | 13    | 8        |
| HOMO-1  | -6.60       | 75   | 12    | 13       |
| HOMO-2  | -6.63       | 76   | 20    | 4        |
| HOMO-3  | -7.75       | 1    | 12    | 88       |
| HOMO-4  | -7.79       | 0    | 99    | 0        |

**Table S9. Compound 7.** Mulliken population analysis of frontier molecular orbitals.

| Orbital | Energy (eV) | % Ru | % bpy | % ligand |
|---------|-------------|------|-------|----------|
| LUMO+6  | -1.50       | 3.7  | 91    | 6        |
| LUMO+5  | -1.53       | 2    | 47    | 50       |
| LUMO+4  | -1.59       | 3    | 95    | 2        |
| LUMO+3  | -1.90       | 1    | 78    | 21       |
| LUMO+2  | -2.51       | 3    | 12    | 84       |
| LUMO+1  | -2.57       | 4    | 95    | 1        |
| LUMO    | -2.67       | 2    | 86    | 12       |
| HOMO    | -6.43       | 79   | 13    | 8        |
| HOMO-1  | -6.59       | 75   | 12    | 14       |
| HOMO-2  | -6.61       | 75   | 20    | 4        |
| HOMO-3  | -7.01       | 0    | 0     | 100      |
| HOMO-4  | -7.72       | 1    | 7     | 93       |
